# Supplementary material for: The Complete Mitochondrial Genome of Eurasian Minnow (Phoxinus cf. Phoxinus) from the Heilongjiang River, and Its Phylogenetic Implications
Source: MDPI journal article supplement (doi:10.3390/ani12212960), 2022-10-27
Supplement: s1 [file s1]

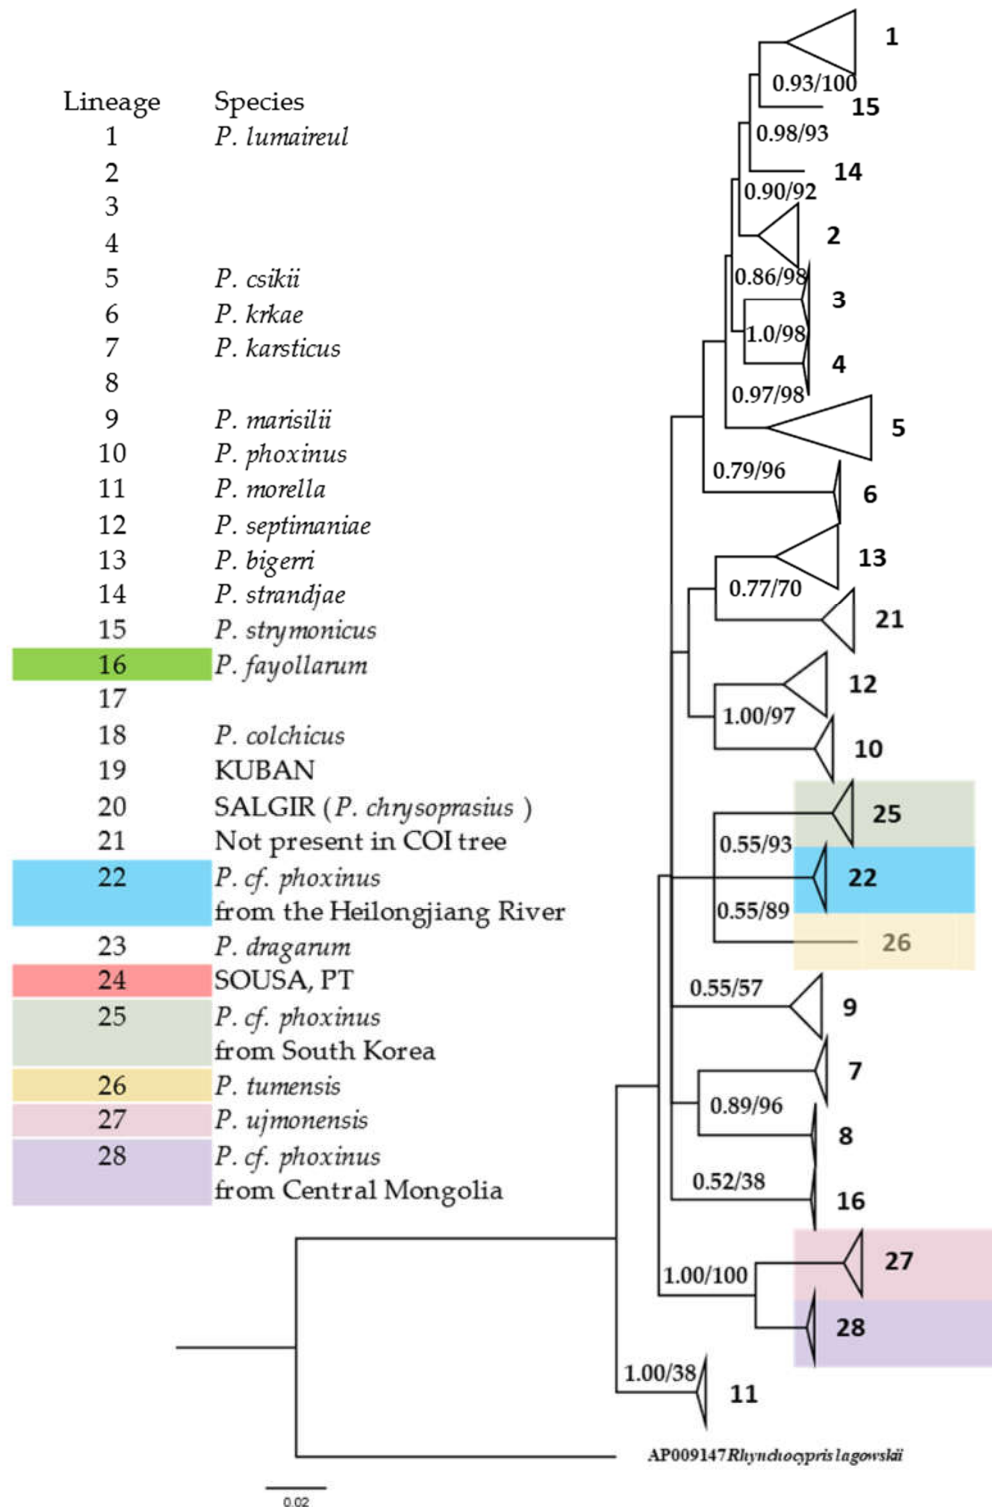

**Figure S1. Bayesian inference (BI) tree of Eurasian *Phoxinus* based on Cytochrome b (*Cyt b*) data.** Posterior probability values for BI (BPP) and bootstrap values for maximum-likelihood (ML) are shown on branches. Genetic lineages are presented in the upper left corner. The genetic lineages that are valid species are written on the right. Only Asian clades lineages are marked in color. *Rhynchocypris lagowskii* (AP009147) was used as the outgroup.

**Table S1.** PCR and internal walking primers for sequencing the mitogenome of *Phoxinus cf. phoxinus* from the Heilongjiang River (HLJ).

| Primers   | Sequence (5'-3')            | Primers | Sequence (5'-3')             |
|-----------|-----------------------------|---------|------------------------------|
| PCR01F    | GTTGGATCAGGACATCCTAATGGTGCA | PCR01R  | AGAAAGTGGTGTAGAGGAAGC        |
| PCR02F    | CCTAAGGACCACTTTGATAGAGTG    | PCR02R  | GCCACAGGTAGGGTAGCYGAGT       |
| PCR03F    | CCAAGCCAGCGAGCATCYATCTAC    | PCR03R  | CTGGCTTGAAACCAGCATATGG       |
| PCR04F    | GCCTACGCCCTGTGAAATACAGT     | PCR04R  | CCAGATTGCTAGRCCGGATGT        |
| walking4  | GATAGGACAYCAATGATACTG       |         |                              |
| PCR05F    | ATGGCCCACCAAGCACATGCATATC   | PCR05R  | GAGATTAAGGTTTTGTAGACGGTC     |
| PCR06F    | GACATTTTCAGCTTTAGCTCAGC     | PCR06R  | GCACCAAGAGTTTTTGGTTCCTAAGACC |
| PCR07F    | GACATTAGATTGTGATTCTAA       | PCR07R  | GTGGAGGAATGCTAGTTGTGGTT      |
| PCR08F    | GGAAAGTCAGCCCAATTTGGCC      | PCR08R  | GGGTCTTTCGTAGGCTTGCCAT       |
| walking8  | CTACTCTAAAACTMGCAGCCCT      |         |                              |
| PCR09F    | GGAGTAGGATTAGAAGCAACAGC     | PCR09R  | GCTTTGGGAGYCAGGGGTGRGAGTT    |
| PCR10F    | GAGCTTGCACTAGTAGCTTAG       | PCR10R  | GGTAACGTATCCCTGAAAGAG        |
| PCR11F    | AGTAGTGAGAGCCCACCAAC        | PCR11R  | GGACTCCTAGAAGCGTATGAC        |
| PCR12F    | GGTAAAACTCGTGCCAGCCA        | PCR12R  | GCCCCTCTTTTCCGRTCCTTTCGTACTA |
| walking12 | GGCATCTCACTTACACCGAGAA      |         |                              |
